# Supplementary material for: Towards True Climate Neutrality for Global Aviation: A Negative Emissions Fund for Airlines
Source: MDPI journal article supplement (doi:10.3390/jrfm15110505), 2022-11-01
Supplement: s1 [file s1]

Table S1: Simplified model of NEFA

Supplementary material for "Towards true Climate Neutrality for Global Aviation: A Negative Emissions Fund for Airlines"

Authors: Sascha Nick, Philippe Thalmann

Updated 23.10.2022

|                                    |          | CO <sub>2</sub><br>emissions<br>[Mt] | Cumulative<br>emissions<br>[Mt] | %<br>removed | CO <sub>2</sub> to be<br>removed<br>[Mt] | Removal<br>capacity<br>[Mt] | Actual<br>removals<br>[Mt] | Net<br>emissions<br>[Mt] | Cumulative<br>removals<br>[Mt] | Fund<br>active | Removal<br>cost<br>[\$/t] | Removal<br>cost paid by<br>fund [\$ bn] | Discounted<br>cost [\$ bn] | Payment to<br>fund for future<br>removal [\$ bn] | Discounted<br>payment to<br>fund [\$ bn] | Balance of<br>fund [\$ bn] |          |
|------------------------------------|----------|--------------------------------------|---------------------------------|--------------|------------------------------------------|-----------------------------|----------------------------|--------------------------|--------------------------------|----------------|---------------------------|-----------------------------------------|----------------------------|--------------------------------------------------|------------------------------------------|----------------------------|----------|
| Simulation parameters              | 2025     | 1000.0                               | 1000.0                          | 12.5%        | 125.0                                    | 0.0                         | 0.0                        | 1000.0                   | 0.0                            | 1              | 400.0                     | 0.00                                    | 0.00                       | 28.73                                            | 28.73                                    | 28.73                      |          |
| Emission reduction p.a.            | 8.80%    | 2026                                 | 912.0                           | 1912.0       | 32.5%                                    | 296.4                       | 1.0                        | -1.0                     | 911.0                          | 1.0            | 1                         | 394.0                                   | -0.39                      | -0.39                                            | 68.13                                    | 66.80                      | 97.05    |
| Initial emissions [Mt/p.a.]        | 1000     | 2027                                 | 831.7                           | 2743.7       | 52.5%                                    | 436.7                       | 1.5                        | -1.5                     | 830.2                          | 2.5            | 1                         | 388.0                                   | -0.58                      | -0.56                                            | 100.38                                   | 96.48                      | 198.79   |
| Final emissions [Mt/p.a.]          | 100      | 2028                                 | 758.6                           | 3502.3       | 72.5%                                    | 549.9                       | 2.3                        | -2.3                     | 756.3                          | 4.8            | 1                         | 382.0                                   | -0.86                      | -0.81                                            | 126.42                                   | 119.13                     | 328.32   |
| NE growth 2027-36                  | 50.0%    | 2029                                 | 691.8                           | 4194.1       | 92.5%                                    | 639.9                       | 3.4                        | -3.4                     | 688.4                          | 8.1            | 1                         | 376.0                                   | -1.27                      | -1.17                                            | 147.10                                   | 135.90                     | 480.72   |
| NE growth 2037+                    | 25.0%    | 2030                                 | 630.9                           | 4825.0       | 100.0%                                   | 630.9                       | 5.1                        | -5.1                     | 625.9                          | 13.2           | 1                         | 370.0                                   | -1.87                      | -1.70                                            | 145.03                                   | 131.36                     | 633.49   |
| Max removals   Mt p.a.]            | 400      | 2031                                 | 575.4                           | 5400.4       | 100.0%                                   | 575.4                       | 7.6                        | -7.6                     | 567.8                          | 20.8           | 1                         | 364.0                                   | -2.76                      | -2.45                                            | 132.27                                   | 117.45                     | 775.66   |
| Removal cost start [\$ /t]         | 400      | 2032                                 | 524.8                           | 5925.2       | 100.0%                                   | 524.8                       | 11.4                       | -11.4                    | 513.4                          | 32.2           | 1                         | 358.0                                   | -4.08                      | -3.55                                            | 120.63                                   | 105.01                     | 907.73   |
| in year                            | 2025     | 2033                                 | 478.6                           | 6403.8       | 100.0%                                   | 478.6                       | 17.1                       | -17.1                    | 461.5                          | 49.3           | 1                         | 352.0                                   | -6.01                      | -5.13                                            | 110.01                                   | 93.90                      | 1,029.88 |
| Removal cost final [\$ /t]         | 250      | 2034                                 | 436.5                           | 6840.2       | 100.0%                                   | 436.5                       | 25.6                       | -25.6                    | 410.8                          | 74.9           | 1                         | 346.0                                   | -8.87                      | -7.42                                            | 100.33                                   | 83.95                      | 1,141.95 |
| from year                          | 2050     | 2035                                 | 398.1                           | 7238.3       | 100.0%                                   | 398.1                       | 38.4                       | -38.4                    | 359.6                          | 113.3          | 1                         | 340.0                                   | -13.07                     | -10.72                                           | 91.50                                    | 75.06                      | 1,243.22 |
| Interest rate                      | 2.00%    | 2036                                 | 363.0                           | 7601.3       | 100.0%                                   | 363.0                       | 57.7                       | -57.7                    | 305.4                          | 171.0          | 1                         | 334.0                                   | -19.26                     | -15.49                                           | 83.45                                    | 67.12                      | 1,332.27 |
| Simulation results                 | 2037     | 331.1                                | 7932.4                          | 100.0%       | 331.1                                    | 72.1                        | -72.1                      | 259.0                    | 243.1                          | 1              | 328.0                     | -23.64                                  | -18.64                     | 76.11                                            | 60.01                                    | 1,411.38                   |          |
| CO <sub>2</sub> price [\$ /t]      | 229.87   | 2038                                 | 301.9                           | 8234.4       | 100.0%                                   | 301.9                       | 90.1                       | -90.1                    | 211.8                          | 333.2          | 1                         | 322.0                                   | -29.01                     | -22.43                                           | 69.41                                    | 53.66                      | 1,480.01 |
| Σ NE payments [\$ bn]              | 3256.16  | 2039                                 | 275.4                           | 8509.7       | 100.0%                                   | 275.4                       | 112.6                      | -112.6                   | 162.8                          | 445.8          | 1                         | 316.0                                   | -35.59                     | -26.97                                           | 63.30                                    | 47.97                      | 1,537.32 |
| Removed excess CO <sub>2</sub> by  | 2072     | 2040                                 | 251.1                           | 8760.9       | 100.0%                                   | 251.1                       | 140.8                      | -140.8                   | 110.4                          | 586.6          | 1                         | 310.0                                   | -43.64                     | -32.43                                           | 57.73                                    | 42.90                      | 1,582.15 |
| Cash flow summary                  | 2041     | 229.0                                | 8989.9                          | 100.0%       | 229.0                                    | 176.0                       | -176.0                     | 53.1                     | 762.6                          | 1              | 304.0                     | -53.50                                  | -38.97                     | 52.65                                            | 38.35                                    | 1,612.95                   |          |
| Total discounted cash flow [\$ bn] | 2042     | 208.9                                | 9198.8                          | 100.0%       | 208.9                                    | 220.0                       | -220.0                     | -11.1                    | 982.5                          | 1              | 298.0                     | -65.55                                  | -46.82                     | 48.02                                            | 34.29                                    | 1,627.67                   |          |
| Paid by fund                       | -1816.79 | 2043                                 | 190.5                           | 9389.3       | 100.0%                                   | 190.5                       | 275.0                      | -275.0                   | -84.5                          | 1257.5         | 1                         | 292.0                                   | -80.29                     | -56.22                                           | 43.79                                    | 30.66                      | 1,623.73 |
| Paid into fund                     | 1816.79  | 2044                                 | 173.7                           | 9563.0       | 100.0%                                   | 173.7                       | 343.7                      | -343.7                   | -170.0                         | 1601.2         | 1                         | 286.0                                   | -98.30                     | -67.48                                           | 39.94                                    | 27.41                      | 1,597.84 |
| Fund inbalance                     | 0.00     | 2045                                 | 158.5                           | 9721.5       | 100.0%                                   | 158.5                       | 400.0                      | -400.0                   | -241.5                         | 2001.2         | 1                         | 280.0                                   | -112.00                    | -75.37                                           | 36.42                                    | 24.51                      | 1,554.22 |
|                                    |          | 2046                                 | 144.5                           | 9866.0       | 100.0%                                   | 144.5                       | 400.0                      | -400.0                   | -255.5                         | 2401.2         | 1                         | 274.0                                   | -109.60                    | -72.31                                           | 33.22                                    | 21.92                      | 1,508.92 |
|                                    |          | 2047                                 | 131.8                           | 9997.8       | 100.0%                                   | 131.8                       | 400.0                      | -400.0                   | -268.2                         | 2801.2         | 1                         | 268.0                                   | -107.20                    | -69.34                                           | 30.30                                    | 19.60                      | 1,462.20 |
|                                    |          | 2048                                 | 120.2                           | 10118.0      | 100.0%                                   | 120.2                       | 400.0                      | -400.0                   | -279.8                         | 3201.2         | 1                         | 262.0                                   | -104.80                    | -66.46                                           | 27.63                                    | 17.52                      | 1,414.27 |
|                                    |          | 2049                                 | 109.6                           | 10227.6      | 100.0%                                   | 109.6                       | 400.0                      | -400.0                   | -290.4                         | 3601.2         | 1                         | 256.0                                   | -102.40                    | -63.66                                           | 25.20                                    | 15.67                      | 1,365.35 |
|                                    |          | 2050                                 | 100.0                           | 10327.6      | 100.0%                                   | 100.0                       | 400.0                      | -400.0                   | -300.0                         | 4001.2         | 1                         | 250.0                                   | -100.00                    | -60.95                                           | 22.99                                    | 14.01                      | 1,315.65 |
|                                    |          | 2051                                 | 100.0                           | 10427.6      | 100.0%                                   | 100.0                       | 400.0                      | -400.0                   | -300.0                         | 4401.2         | 1                         | 250.0                                   | -100.00                    | -59.76                                           | 22.99                                    | 13.74                      | 1,264.95 |
|                                    |          | 2052                                 | 100.0                           | 10527.6      | 100.0%                                   | 100.0                       | 400.0                      | -400.0                   | -300.0                         | 4801.2         | 1                         | 250.0                                   | -100.00                    | -58.59                                           | 22.99                                    | 13.47                      | 1,213.23 |
|                                    |          | 2053                                 | 100.0                           | 10627.6      | 100.0%                                   | 100.0                       | 400.0                      | -400.0                   | -300.0                         | 5201.2         | 1                         | 250.0                                   | -100.00                    | -57.44                                           | 22.99                                    | 13.20                      | 1,160.49 |
|                                    |          | 2054                                 | 100.0                           | 10727.6      | 100.0%                                   | 100.0                       | 400.0                      | -400.0                   | -300.0                         | 5601.2         | 1                         | 250.0                                   | -100.00                    | -56.31                                           | 22.99                                    | 12.94                      | 1,106.68 |
|                                    |          | 2055                                 | 100.0                           | 10827.6      | 100.0%                                   | 100.0                       | 400.0                      | -400.0                   | -300.0                         | 6001.2         | 1                         | 250.0                                   | -100.00                    | -55.21                                           | 22.99                                    | 12.69                      | 1,051.80 |
|                                    |          | 2056                                 | 100.0                           | 10927.6      | 100.0%                                   | 100.0                       | 400.0                      | -400.0                   | -300.0                         | 6401.2         | 1                         | 250.0                                   | -100.00                    | -54.12                                           | 22.99                                    | 12.44                      | 995.83   |
|                                    |          | 2057                                 | 100.0                           | 11027.6      | 100.0%                                   | 100.0                       | 400.0                      | -400.0                   | -300.0                         | 6801.2         | 1                         | 250.0                                   | -100.00                    | -53.06                                           | 22.99                                    | 12.20                      | 938.73   |
|                                    |          | 2058                                 | 100.0                           | 11127.6      | 100.0%                                   | 100.0                       | 400.0                      | -400.0                   | -300.0                         | 7201.2         | 1                         | 250.0                                   | -100.00                    | -52.02                                           | 22.99                                    | 11.96                      | 880.49   |
|                                    |          | 2059                                 | 100.0                           | 11227.6      | 100.0%                                   | 100.0                       | 400.0                      | -400.0                   | -300.0                         | 7601.2         | 1                         | 250.0                                   | -100.00                    | -51.00                                           | 22.99                                    | 11.72                      | 821.09   |
|                                    |          | 2060                                 | 100.0                           | 11327.6      | 100.0%                                   | 100.0                       | 400.0                      | -400.0                   | -300.0                         | 8001.2         | 1                         | 250.0                                   | -100.00                    | -50.00                                           | 22.99                                    | 11.49                      | 760.50   |
|                                    |          | 2061                                 | 100.0                           | 11427.6      | 100.0%                                   | 100.0                       | 400.0                      | -400.0                   | -300.0                         | 8401.2         | 1                         | 250.0                                   | -100.00                    | -49.02                                           | 22.99                                    | 11.27                      | 698.70   |
|                                    |          | 2062                                 | 100.0                           | 11527.6      | 100.0%                                   | 100.0                       | 400.0                      | -400.0                   | -300.0                         | 8801.2         | 1                         | 250.0                                   | -100.00                    | -48.06                                           | 22.99                                    | 11.05                      | 635.66   |
|                                    |          | 2063                                 | 100.0                           | 11627.6      | 100.0%                                   | 100.0                       | 400.0                      | -400.0                   | -300.0                         | 9201.2         | 1                         | 250.0                                   | -100.00                    | -47.12                                           | 22.99                                    | 10.83                      | 571.36   |
|                                    |          | 2064                                 | 100.0                           | 11727.6      | 100.0%                                   | 100.0                       | 400.0                      | -400.0                   | -300.0                         | 9601.2         | 1                         | 250.0                                   | -100.00                    | -46.19                                           | 22.99                                    | 10.62                      | 505.77   |
|                                    |          | 2065                                 | 100.0                           | 11827.6      | 100.0%                                   | 100.0                       | 400.0                      | -400.0                   | -300.0                         | 10001.2        | 1                         | 250.0                                   | -100.00                    | -45.29                                           | 22.99                                    | 10.41                      | 438.88   |
|                                    |          | 2066                                 | 100.0                           | 11927.6      | 100.0%                                   | 100.0                       | 400.0                      | -400.0                   | -300.0                         | 10401.2        | 1                         | 250.0                                   | -100.00                    | -44.40                                           | 22.99                                    | 10.21                      | 370.64   |
|                                    |          | 2067                                 | 100.0                           | 12027.6      | 100.0%                                   | 100.0                       | 400.0                      | -400.0                   | -300.0                         | 10801.2        | 1                         | 250.0                                   | -100.00                    | -43.53                                           | 22.99                                    | 10.01                      | 301.04   |
|                                    |          | 2068                                 | 100.0                           | 12127.6      | 100.0%                                   | 100.0                       | 400.0                      | -400.0                   | -300.0                         | 11201.2        | 1                         | 250.0                                   | -100.00                    | -42.68                                           | 22.99                                    | 9.81                       | 230.05   |
|                                    |          | 2069                                 | 100.0                           | 12227.6      | 100.0%                                   | 100.0                       | 400.0                      | -400.0                   | -300.0                         | 11601.2        | 1                         | 250.0                                   | -100.00                    | -41.84                                           | 22.99                                    | 9.62                       | 157.64   |
|                                    |          | 2070                                 | 100.0                           | 12327.6      | 100.0%                                   | 100.0                       | 400.0                      | -400.0                   | -300.0                         | 12001.2        | 1                         | 250.0                                   | -100.00                    | -41.02                                           | 22.99                                    | 9.43                       | 83.78    |
|                                    |          | 2071                                 | 100.0                           | 12427.6      | 100.0%                                   | 100.0                       | 400.0                      | -400.0                   | -300.0                         | 12401.2        | 1                         | 250.0                                   | -100.00                    | -40.22                                           | 22.99                                    | 9.24                       | 8.44     |
|                                    |          | 2072                                 | 100.0                           | 12527.6      | 100.0%                                   | 100.0                       | 400.0                      | -126.4                   | -26.4                          | 12527.6        | 1                         | 250.0                                   | -31.60                     | -12.46                                           | 22.99                                    | 9.06                       | 0.00     |
|                                    |          | 2073                                 | 100.0                           | 12627.6      | 100.0%                                   | 100.0                       | 400.0                      | -100.0                   | 0.0                            | 12627.6        | 0                         | 250.0                                   | 0.00                       | 0.00                                             | 0.00                                     | 0.00                       | 0.00     |
|                                    |          | 2074                                 | 100.0                           | 12727.6      | 100.0%                                   | 100.0                       | 400.0                      | -100.0                   | 0.0                            | 12727.6        | 0                         | 250.0                                   | 0.00                       | 0.00                                             | 0.00                                     | 0.00                       | 0.00     |
|                                    |          | 2075                                 | 100.0                           | 12827.6      | 100.0%                                   | 100.0                       | 400.0                      | -100.0                   | 0.0                            | 12827.6        | 0                         | 250.0                                   | 0.00                       | 0.00                                             | 0.00                                     | 0.00                       | 0.00     |
|                                    |          | 2076                                 | 100.0                           | 12927.6      | 100.0%                                   | 100.0                       | 400.0                      | -100.0                   | 0.0                            | 12927.6        | 0                         | 250.0                                   | 0.00                       | 0.00                                             | 0.00                                     | 0.00                       | 0.00     |
|                                    |          | 2077                                 | 100.0                           | 13027.6      | 100.0%                                   | 100.0                       | 400.0                      | -100.0                   | 0.0                            | 13027.6        | 0                         | 250.0                                   | 0.00                       | 0.00                                             | 0.00                                     | 0.00                       | 0.00     |
|                                    |          | 2078                                 | 100.0                           | 13127.6      | 100.0%                                   | 100.0                       | 400.0                      | -100.0                   | 0.0                            | 13127.6        | 0                         | 250.0                                   | 0.00                       | 0.00                                             | 0.00                                     | 0.00                       | 0.00     |
|                                    |          | 2079                                 | 100.0                           | 13227.6      | 100.0%                                   | 100.0                       | 400.0                      | -100.0                   | 0.0                            | 13227.6        | 0                         | 250.0                                   | 0.00                       | 0.00                                             | 0.00                                     | 0.00                       | 0.00     |
|                                    |          | 2080                                 | 100.0                           | 13327.6      | 100.0%                                   | 100.0                       | 400.0                      | -100.0                   | 0.0                            | 13327.6        | 0                         | 250.0                                   | 0.00                       | 0.00                                             | 0.00                                     | 0.00                       | 0.00     |
|                                    |          | 2081                                 | 100.0                           | 13427.6      | 100.0%                                   | 100.0                       | 400.0                      | -100.0                   | 0.0                            | 13427.6        | 0                         | 250.0                                   | 0.00                       | 0.00                                             | 0.00                                     | 0.00                       | 0.00     |
|                                    |          | 2082                                 | 100.0                           | 13527.6      | 100.0%                                   | 100.0                       | 400.0                      | -100.0                   | 0.0                            | 13527.6        | 0                         | 250.0                                   | 0.00                       | 0.00                                             | 0.00                                     | 0.00                       | 0.00     |
|                                    |          | 2083                                 | 100.0                           | 13627.6      | 100.0%                                   | 100.0                       | 400.0                      | -100.0                   | 0.0                            | 13627.6        | 0                         | 250.0                                   | 0.00                       | 0.00                                             | 0.00                                     | 0.00                       | 0.00     |
|                                    |          | 2084                                 | 100.0                           | 13727.6      | 100.0%                                   | 100.0                       | 400.0                      | -100.0                   | 0.0                            | 13727.6        | 0                         | 250.0                                   | 0.00                       | 0.00                                             | 0.00                                     | 0.00                       | 0.00     |
|                                    |          | 2085                                 | 100.0                           | 13827.6      | 100.0%                                   | 100.0                       | 400.0                      | -100.0                   | 0.0                            | 13827.6        | 0                         | 250.0                                   | 0.00                       | 0.00                                             | 0.00                                     | 0.00                       | 0.00     |
|                                    |          | 2086                                 | 100.0                           | 13927.6      | 100.0%                                   | 100.0                       | 400.0                      | -100.0                   | 0.0                            | 13927.6        | 0                         | 250.0                                   | 0.00                       | 0.00                                             | 0.00                                     | 0.00                       | 0.00     |
|                                    |          | 2087                                 | 100.0                           | 14027.6      | 100.0%                                   | 100.0                       | 400.0                      | -100.0                   | 0.0                            | 14027.6        | 0                         | 250.0                                   | 0.00                       | 0.00                                             | 0.00                                     | 0.00                       | 0.00     |
|                                    |          | 2088                                 | 100.0                           | 14127.6      | 100.0%                                   | 100.0                       | 400.0                      | -100.0                   | 0.0                            | 14127.6        | 0                         | 250.0                                   | 0.00                       | 0.00                                             | 0.00                                     | 0.00                       | 0.00     |
|                                    |          | 2089                                 | 100.0                           | 14227.6      | 100.0%                                   | 100.0                       | 400.0                      | -100.0                   | 0.0                            | 14227.6        | 0                         | 250.0                                   | 0.00                       | 0.00                                             | 0.00                                     | 0.00                       | 0.00     |
|                                    |          | 2090                                 | 100.0                           | 14327.6      | 100.0%                                   | 100.0                       | 400.0                      | -100.0                   | 0.0                            | 14327.6        | 0                         | 250.0                                   | 0.00                       | 0.00                                             | 0.00                                     | 0.00                       | 0.00     |
|                                    |          | 2091                                 | 100.0                           | 14427.6      | 100.0%                                   | 100.0                       | 400.0                      | -100.0                   | 0.0                            | 14427.6        | 0                         | 250.0                                   | 0.00                       | 0.00                                             | 0.00                                     | 0.00                       | 0.00     |
|                                    |          | 2092                                 | 100.0                           | 14527.6      | 100.0%                                   | 100.0                       | 400.0                      | -100.0                   | 0.0                            | 14527.6        | 0                         | 250.0                                   | 0.00                       | 0.00                                             | 0.00                                     | 0.00                       | 0.00     |
|                                    |          | 2093                                 | 100.0                           | 14627.6      | 100.0%                                   | 100.0                       | 400.0                      | -100.0                   | 0.0                            | 14627.6        | 0                         | 250.0                                   | 0.00                       | 0.00                                             | 0.00                                     | 0.00                       | 0.00     |
|                                    |          | 2094                                 | 100.0                           | 14727.6      | 100.0%                                   | 100.0                       | 400.0                      | -100.0                   | 0.0                            | 14727.6        | 0                         | 250.0                                   | 0.00                       |                                                  |                                          |                            |          |

Table S1: Simplified model of NEFA

Supplementary material for "Towards true Climate Neutrality for Global Aviation: A Negative Emissions Fund for Airlines"

Authors: Sascha Nick, Philippe Thalmann

Updated 23.10.2022

|  |  |      | CO <sub>2</sub><br>emissions<br>[Mt] | Cumulative<br>emissions<br>[Mt] | %<br>removed | CO <sub>2</sub> to be<br>removed<br>[Mt] | Removal<br>capacity<br>[Mt] | Actual<br>removals<br>[Mt] | Net<br>emissions<br>[Mt] | Cumulative<br>removals<br>[Mt] | Fund<br>active | Removal<br>cost<br>[\$/t] | Removal<br>cost paid by<br>fund [\$ bn] | Discounted<br>cost [\$ bn] | Payment to<br>fund for future<br>removal [\$ bn] | Discounted<br>payment to<br>fund [\$ bn] | Balance of<br>fund [\$ bn] |
|--|--|------|--------------------------------------|---------------------------------|--------------|------------------------------------------|-----------------------------|----------------------------|--------------------------|--------------------------------|----------------|---------------------------|-----------------------------------------|----------------------------|--------------------------------------------------|------------------------------------------|----------------------------|
|  |  | 2122 | 100.0                                | 17527.6                         | 100.0%       | 100.0                                    | 400.0                       | -100.0                     | 0.0                      | 17527.6                        | 0              | 250.0                     | 0.00                                    | 0.00                       | 0.00                                             | 0.00                                     | 0.00                       |
|  |  | 2123 | 100.0                                | 17627.6                         | 100.0%       | 100.0                                    | 400.0                       | -100.0                     | 0.0                      | 17627.6                        | 0              | 250.0                     | 0.00                                    | 0.00                       | 0.00                                             | 0.00                                     | 0.00                       |
|  |  | 2124 | 100.0                                | 17727.6                         | 100.0%       | 100.0                                    | 400.0                       | -100.0                     | 0.0                      | 17727.6                        | 0              | 250.0                     | 0.00                                    | 0.00                       | 0.00                                             | 0.00                                     | 0.00                       |
|  |  | 2125 | 100.0                                | 17827.6                         | 100.0%       | 100.0                                    | 400.0                       | -100.0                     | 0.0                      | 17827.6                        | 0              | 250.0                     | 0.00                                    | 0.00                       | 0.00                                             | 0.00                                     | 0.00                       |
|  |  | 2126 | 100.0                                | 17927.6                         | 100.0%       | 100.0                                    | 400.0                       | -100.0                     | 0.0                      | 17927.6                        | 0              | 250.0                     | 0.00                                    | 0.00                       | 0.00                                             | 0.00                                     | 0.00                       |
|  |  | 2127 | 100.0                                | 18027.6                         | 100.0%       | 100.0                                    | 400.0                       | -100.0                     | 0.0                      | 18027.6                        | 0              | 250.0                     | 0.00                                    | 0.00                       | 0.00                                             | 0.00                                     | 0.00                       |
|  |  | 2128 | 100.0                                | 18127.6                         | 100.0%       | 100.0                                    | 400.0                       | -100.0                     | 0.0                      | 18127.6                        | 0              | 250.0                     | 0.00                                    | 0.00                       | 0.00                                             | 0.00                                     | 0.00                       |
|  |  | 2129 | 100.0                                | 18227.6                         | 100.0%       | 100.0                                    | 400.0                       | -100.0                     | 0.0                      | 18227.6                        | 0              | 250.0                     | 0.00                                    | 0.00                       | 0.00                                             | 0.00                                     | 0.00                       |
|  |  | 2130 | 100.0                                | 18327.6                         | 100.0%       | 100.0                                    | 400.0                       | -100.0                     | 0.0                      | 18327.6                        | 0              | 250.0                     | 0.00                                    | 0.00                       | 0.00                                             | 0.00                                     | 0.00                       |
|  |  | 2131 | 100.0                                | 18427.6                         | 100.0%       | 100.0                                    | 400.0                       | -100.0                     | 0.0                      | 18427.6                        | 0              | 250.0                     | 0.00                                    | 0.00                       | 0.00                                             | 0.00                                     | 0.00                       |
|  |  | 2132 | 100.0                                | 18527.6                         | 100.0%       | 100.0                                    | 400.0                       | -100.0                     | 0.0                      | 18527.6                        | 0              | 250.0                     | 0.00                                    | 0.00                       | 0.00                                             | 0.00                                     | 0.00                       |
|  |  | 2133 | 100.0                                | 18627.6                         | 100.0%       | 100.0                                    | 400.0                       | -100.0                     | 0.0                      | 18627.6                        | 0              | 250.0                     | 0.00                                    | 0.00                       | 0.00                                             | 0.00                                     | 0.00                       |
|  |  | 2134 | 100.0                                | 18727.6                         | 100.0%       | 100.0                                    | 400.0                       | -100.0                     | 0.0                      | 18727.6                        | 0              | 250.0                     | 0.00                                    | 0.00                       | 0.00                                             | 0.00                                     | 0.00                       |
|  |  | 2135 | 100.0                                | 18827.6                         | 100.0%       | 100.0                                    | 400.0                       | -100.0                     | 0.0                      | 18827.6                        | 0              | 250.0                     | 0.00                                    | 0.00                       | 0.00                                             | 0.00                                     | 0.00                       |
|  |  | 2136 | 100.0                                | 18927.6                         | 100.0%       | 100.0                                    | 400.0                       | -100.0                     | 0.0                      | 18927.6                        | 0              | 250.0                     | 0.00                                    | 0.00                       | 0.00                                             | 0.00                                     | 0.00                       |
|  |  | 2137 | 100.0                                | 19027.6                         | 100.0%       | 100.0                                    | 400.0                       | -100.0                     | 0.0                      | 19027.6                        | 0              | 250.0                     | 0.00                                    | 0.00                       | 0.00                                             | 0.00                                     | 0.00                       |
|  |  | 2138 | 100.0                                | 19127.6                         | 100.0%       | 100.0                                    | 400.0                       | -100.0                     | 0.0                      | 19127.6                        | 0              | 250.0                     | 0.00                                    | 0.00                       | 0.00                                             | 0.00                                     | 0.00                       |
|  |  | 2139 | 100.0                                | 19227.6                         | 100.0%       | 100.0                                    | 400.0                       | -100.0                     | 0.0                      | 19227.6                        | 0              | 250.0                     | 0.00                                    | 0.00                       | 0.00                                             | 0.00                                     | 0.00                       |
|  |  | 2140 | 100.0                                | 19327.6                         | 100.0%       | 100.0                                    | 400.0                       | -100.0                     | 0.0                      | 19327.6                        | 0              | 250.0                     | 0.00                                    | 0.00                       | 0.00                                             | 0.00                                     | 0.00                       |
|  |  | 2141 | 100.0                                | 19427.6                         | 100.0%       | 100.0                                    | 400.0                       | -100.0                     | 0.0                      | 19427.6                        | 0              | 250.0                     | 0.00                                    | 0.00                       | 0.00                                             | 0.00                                     | 0.00                       |
|  |  | 2142 | 100.0                                | 19527.6                         | 100.0%       | 100.0                                    | 400.0                       | -100.0                     | 0.0                      | 19527.6                        | 0              | 250.0                     | 0.00                                    | 0.00                       | 0.00                                             | 0.00                                     | 0.00                       |
|  |  | 2143 | 100.0                                | 19627.6                         | 100.0%       | 100.0                                    | 400.0                       | -100.0                     | 0.0                      | 19627.6                        | 0              | 250.0                     | 0.00                                    | 0.00                       | 0.00                                             | 0.00                                     | 0.00                       |
|  |  | 2144 | 100.0                                | 19727.6                         | 100.0%       | 100.0                                    | 400.0                       | -100.0                     | 0.0                      | 19727.6                        | 0              | 250.0                     | 0.00                                    | 0.00                       | 0.00                                             | 0.00                                     | 0.00                       |
|  |  | 2145 | 100.0                                | 19827.6                         | 100.0%       | 100.0                                    | 400.0                       | -100.0                     | 0.0                      | 19827.6                        | 0              | 250.0                     | 0.00                                    | 0.00                       | 0.00                                             | 0.00                                     | 0.00                       |
|  |  | 2146 | 100.0                                | 19927.6                         | 100.0%       | 100.0                                    | 400.0                       | -100.0                     | 0.0                      | 19927.6                        | 0              | 250.0                     | 0.00                                    | 0.00                       | 0.00                                             | 0.00                                     | 0.00                       |
|  |  | 2147 | 100.0                                | 20027.6                         | 100.0%       | 100.0                                    | 400.0                       | -100.0                     | 0.0                      | 20027.6                        | 0              | 250.0                     | 0.00                                    | 0.00                       | 0.00                                             | 0.00                                     | 0.00                       |
|  |  | 2148 | 100.0                                | 20127.6                         | 100.0%       | 100.0                                    | 400.0                       | -100.0                     | 0.0                      | 20127.6                        | 0              | 250.0                     | 0.00                                    | 0.00                       | 0.00                                             | 0.00                                     | 0.00                       |
|  |  | 2149 | 100.0                                | 20227.6                         | 100.0%       | 100.0                                    | 400.0                       | -100.0                     | 0.0                      | 20227.6                        | 0              | 250.0                     | 0.00                                    | 0.00                       | 0.00                                             | 0.00                                     | 0.00                       |
|  |  | 2150 | 100.0                                | 20327.6                         | 100.0%       | 100.0                                    | 400.0                       | -100.0                     | 0.0                      | 20327.6                        | 0              | 250.0                     | 0.00                                    | 0.00                       | 0.00                                             | 0.00                                     | 0.00                       |
|  |  |      |                                      |                                 |              |                                          |                             |                            |                          |                                | 48             |                           | -3256.16                                | -1816.79                   | 2386.42                                          | 1816.79                                  |                            |

Table S2: Aviation Key Metrics 1929-2070

|      | Ritchie et al. 2020 | Airlines for America 2022        | This paper              | This paper              | Airlines for America 2022 | Sausen & Schumann 2000 (before 1990)<br>Lee et al. 2021 (from 1990) | This paper                                        | Lee et al. 2021       |
|------|---------------------|----------------------------------|-------------------------|-------------------------|---------------------------|---------------------------------------------------------------------|---------------------------------------------------|-----------------------|
| Year | Past RPK            | Past RPK [10 <sup>12</sup> p-km] | Future RPK (-7.3% p.a.) | Future RPK (-2.5% p.a.) | Load factor               | CO <sub>2</sub> emissions [Mt, right axis]                          | Future CO <sub>2</sub> emissions [Mt, right axis] | Fuel [Mt, right axis] |
| 1929 | 0.000170            | 0.000170                         |                         |                         |                           |                                                                     |                                                   |                       |
| 1930 | 0.000270            | 0.000270                         |                         |                         |                           |                                                                     |                                                   |                       |
| 1931 | 0.000330            | 0.000330                         |                         |                         |                           |                                                                     |                                                   |                       |
| 1932 | 0.000405            | 0.000405                         |                         |                         |                           |                                                                     |                                                   |                       |
| 1933 | 0.000545            | 0.000545                         |                         |                         |                           |                                                                     |                                                   |                       |
| 1934 | 0.000650            | 0.000650                         |                         |                         |                           |                                                                     |                                                   |                       |
| 1935 | 0.000920            | 0.000920                         |                         |                         |                           |                                                                     |                                                   |                       |
| 1936 | 0.001225            | 0.001225                         |                         |                         |                           |                                                                     |                                                   |                       |
| 1937 | 0.001410            | 0.001410                         |                         |                         |                           |                                                                     |                                                   |                       |
| 1938 | 0.001685            | 0.001685                         |                         |                         |                           |                                                                     |                                                   |                       |
| 1939 | 0.002030            | 0.002030                         |                         |                         |                           |                                                                     |                                                   |                       |
| 1940 | 0.002530            | 0.002530                         |                         |                         |                           | 28.2                                                                |                                                   |                       |
| 1941 | 0.003               | 0.003                            |                         |                         |                           | 30.4                                                                |                                                   |                       |
| 1942 | 0.004               | 0.004                            |                         |                         |                           | 33.0                                                                |                                                   |                       |
| 1943 | 0.004               | 0.004                            |                         |                         |                           | 35.6                                                                |                                                   |                       |
| 1944 | 0.005               | 0.005                            |                         |                         |                           | 38.5                                                                |                                                   |                       |
| 1945 | 0.008               | 0.008                            |                         |                         |                           | 41.4                                                                |                                                   |                       |
| 1946 | 0.016               | 0.016                            |                         |                         |                           | 45.1                                                                |                                                   |                       |
| 1947 | 0.019               | 0.019                            |                         |                         |                           | 48.4                                                                |                                                   |                       |
| 1948 | 0.021               | 0.021                            |                         |                         |                           | 52.4                                                                |                                                   |                       |
| 1949 | 0.024               | 0.024                            |                         |                         |                           | 56.5                                                                |                                                   |                       |
| 1950 | 0.028               | 0.028                            |                         |                         | 60.87%                    | 61.2                                                                |                                                   |                       |
| 1951 | 0.035               | 0.035                            |                         |                         | 63.64%                    | 66.0                                                                |                                                   |                       |
| 1952 | 0.040               | 0.040                            |                         |                         | 62.50%                    | 71.1                                                                |                                                   |                       |
| 1953 | 0.047               | 0.047                            |                         |                         | 62.67%                    | 77.0                                                                |                                                   |                       |
| 1954 | 0.052               | 0.052                            |                         |                         | 60.47%                    | 83.2                                                                |                                                   |                       |
| 1955 | 0.061               | 0.061                            |                         |                         | 61.62%                    | 89.8                                                                |                                                   |                       |
| 1956 | 0.071               | 0.071                            |                         |                         | 62.28%                    | 97.2                                                                |                                                   |                       |
| 1957 | 0.082               | 0.082                            |                         |                         | 61.65%                    | 104.9                                                               |                                                   |                       |
| 1958 | 0.085               | 0.085                            |                         |                         | 58.22%                    | 113.3                                                               |                                                   |                       |
| 1959 | 0.098               | 0.098                            |                         |                         | 60.49%                    | 122.1                                                               |                                                   |                       |
| 1960 | 0.109               | 0.200                            |                         |                         | 59.24%                    | 132.0                                                               |                                                   |                       |
| 1961 | 0.117               | 0.117                            |                         |                         | 55.19%                    | 144.8                                                               |                                                   |                       |
| 1962 | 0.130               | 0.130                            |                         |                         | 53.50%                    | 159.5                                                               |                                                   |                       |
| 1963 | 0.147               | 0.147                            |                         |                         | 53.65%                    | 168.3                                                               |                                                   |                       |
| 1964 | 0.171               | 0.171                            |                         |                         | 55.88%                    | 176.0                                                               |                                                   |                       |
| 1965 | 0.198               | 0.198                            |                         |                         | 55.93%                    | 188.1                                                               |                                                   |                       |
| 1966 | 0.229               | 0.229                            |                         |                         | 57.68%                    | 203.9                                                               |                                                   |                       |
| 1967 | 0.273               | 0.273                            |                         |                         | 56.99%                    | 240.5                                                               |                                                   |                       |
| 1968 | 0.309               | 0.309                            |                         |                         | 53.45%                    | 272.4                                                               |                                                   |                       |
| 1969 | 0.351               | 0.351                            |                         |                         | 51.99%                    | 285.3                                                               |                                                   |                       |
| 1970 | 0.460               | 0.460                            |                         |                         | 54.82%                    | 286.0                                                               |                                                   |                       |
| 1971 | 0.494               | 0.494                            |                         |                         | 54.06%                    | 330.0                                                               |                                                   |                       |
| 1972 | 0.560               | 0.560                            |                         |                         | 57.11%                    | 352.0                                                               |                                                   |                       |
| 1973 | 0.618               | 0.618                            |                         |                         | 57.63%                    | 364.5                                                               |                                                   |                       |
| 1974 | 0.656               | 0.656                            |                         |                         | 59.27%                    | 352.0                                                               |                                                   |                       |
| 1975 | 0.697               | 0.697                            |                         |                         | 59.15%                    | 352.4                                                               |                                                   |                       |
| 1976 | 0.764               | 0.764                            |                         |                         | 60.15%                    | 353.5                                                               |                                                   |                       |
| 1977 | 0.818               | 0.818                            |                         |                         | 60.78%                    | 374.4                                                               |                                                   |                       |
| 1978 | 0.936               | 0.936                            |                         |                         | 64.52%                    | 387.6                                                               |                                                   |                       |
| 1979 | 1.060               | 1.060                            |                         |                         | 65.97%                    | 403.7                                                               |                                                   |                       |
| 1980 | 1.089               | 1.089                            |                         |                         | 63.18%                    | 406.6                                                               |                                                   |                       |
| 1981 | 1.119               | 1.119                            |                         |                         | 63.71%                    | 400.8                                                               |                                                   |                       |
| 1982 | 1.142               | 1.142                            |                         |                         | 63.64%                    | 405.2                                                               |                                                   |                       |
| 1983 | 1.190               | 1.190                            |                         |                         | 64.24%                    | 410.7                                                               |                                                   |                       |
| 1984 | 1.278               | 1.278                            |                         |                         | 64.81%                    | 438.2                                                               |                                                   |                       |
| 1985 | 1.367               | 1.367                            |                         |                         | 65.71%                    | 452.5                                                               |                                                   |                       |
| 1986 | 1.452               | 1.452                            |                         |                         | 64.98%                    | 476.3                                                               |                                                   |                       |
| 1987 | 1.590               | 1.589                            |                         |                         | 67.14%                    | 497.2                                                               |                                                   |                       |
| 1988 | 1.705               | 1.705                            |                         |                         | 67.57%                    | 518.5                                                               |                                                   |                       |
| 1989 | 1.774               | 1.774                            |                         |                         | 68.01%                    | 537.2                                                               |                                                   |                       |
| 1990 | 1.894               | 1.894                            |                         |                         | 67.63%                    | 549.6                                                               |                                                   | 173.90                |
| 1991 | 1.845               | 1.845                            |                         |                         | 66.39%                    | 531.5                                                               |                                                   | 168.20                |
| 1992 | 1.929               | 1.929                            |                         |                         | 65.83%                    | 532.8                                                               |                                                   | 168.60                |
| 1993 | 1.949               | 1.949                            |                         |                         | 64.69%                    | 535.7                                                               |                                                   | 169.50                |
| 1994 | 2.100               | 2.100                            |                         |                         | 66.26%                    | 561.2                                                               |                                                   | 177.60                |
| 1995 | 2.248               | 2.248                            |                         |                         | 66.94%                    | 574.9                                                               |                                                   | 181.90                |
| 1996 | 2.432               | 2.432                            |                         |                         | 68.23%                    | 600.9                                                               |                                                   | 190.20                |
| 1997 | 2.573               | 2.573                            |                         |                         | 69.02%                    | 619.2                                                               |                                                   | 195.90                |
| 1998 | 2.628               | 2.628                            |                         |                         | 68.48%                    | 631.4                                                               |                                                   | 199.80                |
| 1999 | 2.798               | 2.798                            |                         |                         | 69.07%                    | 651.8                                                               |                                                   | 206.30                |
| 2000 | 3.201               | 3.201                            |                         |                         | 71.07%                    | 685.5                                                               |                                                   | 216.90                |
| 2001 | 3.109               | 3.109                            |                         |                         | 69.24%                    | 659.4                                                               |                                                   | 208.70                |
| 2002 | 3.124               | 3.124                            |                         |                         | 71.34%                    | 660.7                                                               |                                                   | 209.10                |
| 2003 | 3.180               | 3.180                            |                         |                         | 71.58%                    | 660.3                                                               |                                                   | 209.00                |
| 2004 | 3.629               | 3.629                            |                         |                         | 73.39%                    | 701.9                                                               |                                                   | 222.10                |

Table S2: Aviation Key Metrics 1929-2070

|      | Ritchie et al. 2020 | Airlines for America 2022        | This paper              | This paper              | Airlines for America 2022 | Sausen & Schumann 2000 (before 1990) Lee et al. 2021 (from 1990) | This paper                                        | Lee et al. 2021       |
|------|---------------------|----------------------------------|-------------------------|-------------------------|---------------------------|------------------------------------------------------------------|---------------------------------------------------|-----------------------|
| Year | Past RPK            | Past RPK [10 <sup>12</sup> p-km] | Future RPK (−7.3% p.a.) | Future RPK (−2.5% p.a.) | Load factor               | CO <sub>2</sub> emissions [Mt, right axis]                       | Future CO <sub>2</sub> emissions [Mt, right axis] | Fuel [Mt, right axis] |
| 2005 | 3.919               | 3.919                            |                         |                         | 74.94%                    | 736.4                                                            |                                                   | 233.00                |
| 2006 | 4.171               | 4.171                            |                         |                         | 75.82%                    | 744.9                                                            |                                                   | 235.70                |
| 2007 | 4.513               | 4.513                            |                         |                         | 76.80%                    | 766.6                                                            |                                                   | 242.60                |
| 2008 | 4.609               | 4.608                            |                         |                         | 76.01%                    | 763.0                                                            |                                                   | 241.50                |
| 2009 | 4.561               | 4.561                            |                         |                         | 76.68%                    | 723.6                                                            |                                                   | 229.00                |
| 2010 | 4.924               | 4.930                            |                         |                         | 78.17%                    | 760.1                                                            |                                                   | 240.50                |
| 2011 | 5.248               | 5.264                            |                         |                         | 78.01%                    | 782.7                                                            |                                                   | 247.70                |
| 2012 | 5.529               | 5.545                            |                         |                         | 78.86%                    | 791.1                                                            |                                                   | 250.40                |
| 2013 | 5.833               | 5.850                            |                         |                         | 79.48%                    | 813.6                                                            |                                                   | 257.50                |
| 2014 | 6.181               | 6.199                            |                         |                         | 79.72%                    | 839.2                                                            |                                                   | 265.60                |
| 2015 | 6.645               | 6.664                            |                         |                         | 80.24%                    | 885.1                                                            |                                                   | 280.10                |
| 2016 | 7.136               | 7.157                            |                         |                         | 80.29%                    | 927.9                                                            |                                                   | 293.60                |
| 2017 | 7.707               | 7.730                            |                         |                         | 81.48%                    | 982.6                                                            |                                                   | 311.00                |
| 2018 | 8.258               | 8.293                            |                         |                         | 81.72%                    | 1033.7                                                           |                                                   | 327.10                |
| 2019 | 8.677               | 8.677                            |                         |                         | 82.39%                    |                                                                  |                                                   |                       |
| 2020 | 2.990               | 2.990                            |                         |                         | 65.29%                    |                                                                  |                                                   |                       |
| 2021 |                     | 3.609                            | 3.609                   | 3.609                   | 67.20%                    |                                                                  |                                                   |                       |
| 2022 |                     |                                  | 4.882                   | 4.882                   | 70.90%                    |                                                                  |                                                   |                       |
| 2023 |                     |                                  | 6.155                   | 6.155                   | 74.60%                    |                                                                  |                                                   |                       |
| 2024 |                     |                                  | 7.427                   | 7.427                   | 78.30%                    |                                                                  |                                                   |                       |
| 2025 |                     |                                  | 8.700                   | 8.700                   | 82.00%                    |                                                                  | 1000.0                                            |                       |
| 2026 |                     |                                  | 8.065                   | 8.483                   | 83.00%                    |                                                                  | 912.0                                             |                       |
| 2027 |                     |                                  | 7.476                   | 8.270                   | 84.00%                    |                                                                  | 831.8                                             |                       |
| 2028 |                     |                                  | 6.930                   | 8.064                   | 85.00%                    |                                                                  | 758.6                                             |                       |
| 2029 |                     |                                  | 6.424                   | 7.862                   | 86.00%                    |                                                                  | 691.8                                             |                       |
| 2030 |                     |                                  | 5.955                   | 7.666                   | 87.00%                    |                                                                  | 631.0                                             |                       |
| 2031 |                     |                                  | 5.521                   | 7.474                   | 88.00%                    |                                                                  | 575.4                                             |                       |
| 2032 |                     |                                  | 5.118                   | 7.287                   | 89.00%                    |                                                                  | 524.8                                             |                       |
| 2033 |                     |                                  | 4.744                   | 7.105                   | 90.00%                    |                                                                  | 478.6                                             |                       |
| 2034 |                     |                                  | 4.398                   | 6.927                   | 90.00%                    |                                                                  | 436.5                                             |                       |
| 2035 |                     |                                  | 4.077                   | 6.754                   | 90.00%                    |                                                                  | 398.1                                             |                       |
| 2036 |                     |                                  | 3.779                   | 6.585                   | 90.00%                    |                                                                  | 363.1                                             |                       |
| 2037 |                     |                                  | 3.503                   | 6.421                   | 90.00%                    |                                                                  | 331.1                                             |                       |
| 2038 |                     |                                  | 3.248                   | 6.260                   | 90.00%                    |                                                                  | 302.0                                             |                       |
| 2039 |                     |                                  | 3.010                   | 6.104                   | 90.00%                    |                                                                  | 275.4                                             |                       |
| 2040 |                     |                                  | 2.791                   | 5.951                   | 90.00%                    |                                                                  | 251.2                                             |                       |
| 2041 |                     |                                  | 2.587                   | 5.802                   | 90.00%                    |                                                                  | 229.1                                             |                       |
| 2042 |                     |                                  | 2.398                   | 5.657                   | 90.00%                    |                                                                  | 208.9                                             |                       |
| 2043 |                     |                                  | 2.223                   | 5.516                   | 90.00%                    |                                                                  | 190.5                                             |                       |
| 2044 |                     |                                  | 2.061                   | 5.378                   | 90.00%                    |                                                                  | 173.8                                             |                       |
| 2045 |                     |                                  | 1.910                   | 5.243                   | 90.00%                    |                                                                  | 158.5                                             |                       |
| 2046 |                     |                                  | 1.771                   | 5.112                   | 90.00%                    |                                                                  | 144.5                                             |                       |
| 2047 |                     |                                  | 1.642                   | 4.984                   | 90.00%                    |                                                                  | 131.8                                             |                       |
| 2048 |                     |                                  | 1.522                   | 4.860                   | 90.00%                    |                                                                  | 120.2                                             |                       |
| 2049 |                     |                                  | 1.411                   | 4.738                   | 90.00%                    |                                                                  | 109.6                                             |                       |
| 2050 |                     |                                  | 1.308                   | 4.620                   | 90.00%                    |                                                                  | 100.0                                             |                       |
| 2051 |                     |                                  | 1.300                   | 4.504                   | 90.00%                    |                                                                  | 100.0                                             |                       |
| 2052 |                     |                                  | 1.300                   | 4.392                   | 90.00%                    |                                                                  | 100.0                                             |                       |
| 2053 |                     |                                  | 1.300                   | 4.282                   | 90.00%                    |                                                                  | 100.0                                             |                       |
| 2054 |                     |                                  | 1.300                   | 4.175                   | 90.00%                    |                                                                  | 100.0                                             |                       |
| 2055 |                     |                                  | 1.300                   | 4.071                   | 90.00%                    |                                                                  | 100.0                                             |                       |
| 2056 |                     |                                  | 1.300                   | 3.969                   | 90.00%                    |                                                                  | 100.0                                             |                       |
| 2057 |                     |                                  | 1.300                   | 3.870                   | 90.00%                    |                                                                  | 100.0                                             |                       |
| 2058 |                     |                                  | 1.300                   | 3.773                   | 90.00%                    |                                                                  | 100.0                                             |                       |
| 2059 |                     |                                  | 1.300                   | 3.679                   | 90.00%                    |                                                                  | 100.0                                             |                       |
| 2060 |                     |                                  | 1.300                   | 3.587                   | 90.00%                    |                                                                  | 100.0                                             |                       |
| 2061 |                     |                                  | 1.300                   | 3.497                   | 90.00%                    |                                                                  | 100.0                                             |                       |
| 2062 |                     |                                  | 1.300                   | 3.409                   | 90.00%                    |                                                                  | 100.0                                             |                       |
| 2063 |                     |                                  | 1.300                   | 3.324                   | 90.00%                    |                                                                  | 100.0                                             |                       |
| 2064 |                     |                                  | 1.300                   | 3.241                   | 90.00%                    |                                                                  | 100.0                                             |                       |
| 2065 |                     |                                  | 1.300                   | 3.160                   | 90.00%                    |                                                                  | 100.0                                             |                       |
| 2066 |                     |                                  | 1.300                   | 3.081                   | 90.00%                    |                                                                  | 100.0                                             |                       |
| 2067 |                     |                                  | 1.300                   | 3.004                   | 90.00%                    |                                                                  | 100.0                                             |                       |
| 2068 |                     |                                  | 1.300                   | 2.929                   | 90.00%                    |                                                                  | 100.0                                             |                       |
| 2069 |                     |                                  | 1.300                   | 2.856                   | 90.00%                    |                                                                  | 100.0                                             |                       |
| 2070 |                     |                                  | 1.300                   | 2.784                   | 90.00%                    |                                                                  | 100.0                                             |                       |

## References

Airlines for America. 2022. World Airlines Traffic and Capacity, March 2022. Airlines For America. March 2022. Available online: <https://www.airlines.org/dataset/world-airlines-traffic-and-capacity/> (accessed on 23 October 2022).

Lee, David S., Fahey, David W., Skowron, Agnieszka, Allen, Myles R., Burkhardt, Ulrike, Chen, Qi, Doherty, Sarah J. et al. . 2021. The Contribution of Global Aviation to Anthropogenic Climate Forcing for 2000 to 2018. *Atmospheric Environment* 244: 117834. <https://doi.org/10.1016/j.atmosenv.2020.117834>.

Ritchie, Hannah, Max Roser, and Pablo Rosado. 2020. CO2 Emissions from Aviation. Our World in Data. 28 November 2020. Available online: <https://ourworldindata.org/co2-emissions-from-aviation> (accessed on 23 October 2022).

Sausen, Robert, and Ulrich Schumann. 2000. Estimates of the climate response to aircraft CO<sub>2</sub> and NO<sub>x</sub> emissions scenarios. *Climatic Change* 44: 27–58.
